# Supplementary material
Source: PubMed Central journal article supplement (PMC6593641)
Supplement: jama-321-2414-s003.pdf [file jama-321-2414-s003.pdf]

## Supplementary Online Content

Watanabe H, Domei T, Morimoto T, et al; for the STOPDAPT-2 Investigators. Effect of 1-month dual antiplatelet therapy followed by clopidogrel vs 12-month dual antiplatelet therapy on cardiovascular and bleeding events in patients receiving PCI: the STOPDAPT-2 randomized clinical trial [published June 25, 2019]. *JAMA*. doi:10.1001/jama.2019.8145

### Data Sharing Statement

#### Data

**Data available:** No
